# Supplementary material for: Multifaceted mutational immunotherapeutic approach to design therapeutic mAbs to combat monkeypox disease via integrated screening algorithms and antibody engineering
Source: Royal Society of Chemistry journal article supplement (doi:10.1039/d3me00059a), 2023-01-01
Supplement: d3me00059a1.xlsx [file d3me00059a1.xlsx]

## Sheet: Supplementary Table 1
Structural assessment of the MPXV enzymes obtained from GalaxyRefine webserver based on various criteria,such as Rama favored, bad rotamers, clash score, MolProbity, RMSD, and GDT-HA
S. No.	Protein	Model selected	GDT-HA	RMSD	MolProbity	Clash score	Poor rotamers	Rama favoured
1	RNA polymerase (A6R)	Initial	1	0	2.589	6.1	8.1	89.3
		Model 1	0.929	0.49	1.453	8.4	0.7	98.7
2	Methyltransferase (VP39)	Initial	1	0	3.36	17.1	14	78.2
		Model 2	0.952	0.43	2.389	22.8	0	90.3
3	D9 decapping enzyme (E9R)	Initial	1	0	2.019	0.7	7.5	86.7
		Model 4	0.975	0.33	1.793	8.6	1	95.3
4	Thymidine kinase (L2R)	Initial	1	0	2.615	4.7	11	88.6
		Model 3	0.979	0.34	1.903	13.2	0.6	96

## Sheet: Supplementary Table 2
	ClusPro Binding Sites				GRAMM Binding Sites
	Protein	Eculizumab			Protein	Eculizumab
	Thymidine kinase	H-Chain	L-Chain		Thymidine kinase	H-Chain	L-Chain
	GLY 16	PHE 101			ARG 26	PRO 41
	GLU 20	TRP 33			ARG 27	GLY 42
	ARG 23	GLU 59			GLU 20		GLY 41
	ARG 23	GLU 50			LYS 133		LYS 42
	ARG 26	GLU 59
	ARG 27	SER 57
	ARG 27	SER 57
	ARG 27	SER 57
	LYS 133	ASN 31
	THR 135	TYR 32
	ASN 163	SER 104
	ASN 163	ASN 106
	LEU 50		TYR 30
	THR52		GLU 27
	THR52		ASN 93
	HIS 53		ASN 93
	Protein	Eculizumab mutant (L: L92F)			Protein	Eculizumab mutant (L: L92F)
	Thymidine kinase	H-Chain	L-Chain		Thymidine kinase	H-Chain	L-Chain
	PHE 14	SER 103			ARG 26	PRO 41
	GLY 16	PHE 101			ARG 27	GLY 42
	ARG 23	ASN 31
	ARG 27	SER 55
	ARG 27	SER 55			GLU 20		GLY 41
	ARG 27	SER 55			LYS 133		LYS 42
	ARG 27	GLY 56
	ARG 27	SER 57
	THR 135	TYR 32
	LYS 143	GLN 1
	GLU 144	ILE 28
	ASN 163	SER 104
	ARG 26		THR 94
	ARG 26		THR 94
	THR 52		ASN 93
	THR 52		GLU 27
	HIS 53		ASN 93
	HIS 53		ASP 1
	ASN 163		TYR 49
	GLN 167		ASP 56
	Protein	Vofatamab			Protein	Vofatamab
	Thymidine kinase	H-Chain	L-Chain		Thymidine kinase	H-Chain	L-Chain
	GLY 16	TYR 99			LYS 39	GLU 1
	ARG 23	TYR 99			GLY 47	GLN 3
	ARG 23	TYR 99			GLY 49	GLN 3
	ARG 27	SER 54
	ARG 27	SER 54
	ARG 27	SER 56			HIS 5		GLU 81
	ASP 43	TYR 100B			GLU 20		LYS 45
	GLY 47	ASP 100D			ARG 24		LYS 39
					ARG 24		GLY 57
					ARG 27		LYS 37
					GLN 29		LYS 42
					ASP 54		LYS 42
	Protein	Vofatamab mutant (L: H94T, L: Q96V)			Protein	Vofatamab mutant (L: H94T, L: Q96V)
	Thymidine kinase	H-Chain	L-Chain		Thymidine kinase	H-Chain	L-Chain
	PHE 14	TYR 52			LYS 39	GLU 1
	SER 15	SER 54			GLY 47	GLN 3
	ARG 23	SER 56			GLY 49	GLN 3
	ARG 23	TYR 100E
	ARG 23	SER 54
	ARG 23	SER 56			HIS 5		GLU 81
	ASP 43	TYR 100B			GLU 20		LYS 45
	ARG 45	ASP 100			ARG 24		LYS 39
	GLY 47	ASP 100D			ARG 24		GLY 57
	TRP 51	TYR 100E			ARG 27		LYS 37
	VAL 137	TYR 52			GLN 29		LYS 42
	PHE 142	THR 28			ASP 54		LYS 42
	LYS 143	THR 28
	ASN 163	TRY 96
	Protein	Eculizumab			Protein	Eculizumab
	Methyltransferase	H-Chain	L-Chain		Methyltransferase	H-Chain	L-Chain
	TYR 77	SER 55			ARG 76	GLY 54
	ASP 80	SER 30			ARG 76	SER 55
	ASP 80	ASN 31			ASN 255	SER 103
	ASN 255	SER 103			GLN 287	SER 103
	ASN 255	SER 103			ARG 292	TRP 33
	LYS 274	GLN 1
	LYS 274	GLN 1
	GLN 288	PHE 101
	SER 289	TYR 32
	ARG 292	PHE 100
	ARG 292	PHE 100
	SER 300	SER 103
	ARG 330	GLU 50
	ASN 332	GLU 59
	VAL 329		THR 94
	Protein	Eculizumab mutant (L: L92F)			Protein	Eculizumab mutant (L: L92F)
	Methyltransferase	H-Chain	L-Chain		Methyltransferase	H-Chain	L-Chain
	ASN 255	SER 103			ALA 27	GLY 26
	ASN 255	SER 104			ASN 28	SER 77
	TYR 260	SER 103			ALA 31	TYR 27
	LYS 274	GLN 1			TYR 36	SER 103
	PHE 285	TYR 32			LYS 142	ASP 110
	GLN 288	PHE 101			TYR 204	GLN 3
	SER 289	ASN 31			ASN 324	SER 103
	SER 289	TYR 32
	ARG 292	PHE 100			GLY 96		LEU 54
	ARG 292	GLU 50			HIS 98		TYR 49
	ARG 292	PHE 100
	THR 298	SER 103			GLN 39		GLN 38
	THR 298	SER 103			GLN 43		TYR 87
	SER 300	SER 103			TRP 107		ASN 34
	ARG 330	GLU 50
	GLU 302		GLY 31
	GLU 302		ALA 32
	LYS 303		TYR 30
	GLU 307		TYR 30
	Protein	Vofatamab			Protein	Vofatamab
	Methyltransferase	H-Chain	L-Chain		Methyltransferase	H-Chain	L-Chain
	HIS 192		SER 50		ARG 323	ASP 101
	ASN 218		LEU 54		GLU 29		SER 77
	ARG 220		SER 50		LYS 32		SER 60
					ARG 97		LEU 54
					ASP 100		SER 56
					ARG 143		SER 65
					LYS 312		LYS 39
					ASP 317		LYS 45
					SER 318		GLU 81
					ASN 322		LYS 45
					ARG 327		GLY 57
					ARG 327		GLY 57
	Protein	Vofatamab mutant (L: H94T, L: Q96V)			Protein	Vofatamab mutant (L: H94T, L: Q96V)
	Methyltransferase	H-Chain	L-Chain		Methyltransferase	H-Chain	L-Chain
	LYS 8	PRO 52A			ARG 323	ASP 101
	GLU 14	THR 100F			GLU 29		SER 77
	GLU 14	THR 100F			LYS 32		SER 60
	GLU 15	SER 56			ARG 97		LEU 54
	GLU 15	SER 54			ASP 100		SER 56
	GLU 15	TYR 99			ARG 143		SER 65
	ASP 17	SER 56			ASP 317		LYS 45
	LYS 52	SER 31			SER 318		GLU 81
	LYS 52	TYR 52			ASN 322		LYS 45
	ARG 55	THR 28			ARG 327		GLY 57
	GLY 193	ASP 100			ARG 327		GLY 57
	GLY 193	TYR 99
	ASN 194	TYR 52
	ASN 194	GLY 97
	LYS 195	ASP 100
	LYS 195	LEU 100A
	LYS 195	VAL 100C
	LYS 195	ASP 100D
	LYS 195	THR 100F
	ARG 220	GLU 100G
	ARG 220	GLU 100G
	ASN 231	ASP 100D
	LYS 235	TYR 100E
	ARG 220		SER 50
	Protein	Eculizumab			Protein	Eculizumab
	D9 decapping enzyme	H-Chain	L-Chain		D9 decapping enzyme	H-Chain	L-Chain
	ARG 51	SER 30			HIS 33	GLU 1
	ARG 51	SER 30			ARG 125	THR 28
	ARG 85	GLU 59			GLU 183	SER 25
	GLU 86	TRP 33
	ARG92	GLU 59
	ARG 92	GLU 62
	GLU 104	SER 103
	ILE 179	ASN 31
	TYR 180	ILE 28
	TYR 180	ILE 28
	LYS 188	SER 103
	ASP 192	SER 104
	TYR 81		ASN 93
	ARG 85		THR 94
	ARG 85		THR 94
	ILE 96		ASN 93
	ASN 98		TYR 30
	Protein	Eculizumab mutant (L: L92F)			Protein	Eculizumab mutant (L: L92F)
	D9 decapping enzyme	H-Chain	L-Chain		D9 decapping enzyme	H-Chain	L-Chain
	ARG 51	SER 103			ARG 51	GLY 115
	ARG 51	GLY 102			LYS 128	GLN 1
	ARG 51	GLY 102			GLU 133	GLN 1
	ASN 82	PHE 100
	ASN 82	SER 104
	ARG 85	TYR 99			THR 52		LYS 42
	ARG 85	GLU 50			SER 31		VAL 104
	ARG 85	GLU 50			ASN 64		LYS 103
	ARG 92	GLU59			ASP 114		GLY 57
	ARG 92	GLU 50			ARG 125		ASP 56
	ARG 92	GLU 59			LYS 156		PRO 80
	ARG 185	SER 103
	ARG 185	SER 104
	ARG 185	SER 103
	TYR 81		VAL 91
	TYR 81		PHE 92
	ARG 92		THR 94
	SER 95		GLU 27
	ILE 96		TYR 30
	ASN 98		TYR 30
	SER 178		ASP 56
	Protein	Vofatamab			Protein	Vofatamab
	D9 decapping enzyme	H-Chain	L-Chain		D9 decapping enzyme	H-Chain	L-Chain
	LYS 30	ASP 61			ARG 51	GLY 115
	HIS 33	ASP 100D			LYS 128	GLN 1
	ALA 58	TYR 99			GLU 133	GLN 1
	SER 61	THR 32			THR 52		LYS 42
	SER 61	TYR 52			SER 61		VAL 104
	SER 61	GLY 97			ASN 64		LYS 103
	ASN 64	THR 28			ASP 114		GLY 57
	ASN 64	GLY 26			ARG 125		ASP 56
	LYS 115	ASP 61			LYS 156		PRO 80
	ASP 151	TYR 100B
	LYS 156	ILE 98
	LYS 156	ASP 100
	TYR 158	ASP 100
	TYR 158	ASP 100
	TYR 158	THR 100 F
	GLU 183	TYR 100E
	LYS 198	TYR 100B
	LYS 30		ASP 1
	LYS 30		ASP 1
	LYS 146		ASP 28
	ASN 155		THR 31
	ASN 155		THR 31
	ASN 155		SER 50
	Protein	Vofatamab mutant (L: H94T, L: Q96V)			Protein	Vofatamab mutant (L: H94T, L: Q96V)
	D9 decapping enzyme	H-Chain	L-Chain		D9 decapping enzyme	H-Chain	L-Chain
	HIS 33	ASP 100D			HIS 33	GLU 1
	ARG 50	TYR 100E			ARG 125	THR 28
	SER 61	ARG 94			GLU 183	SER 25
	SER 61	ARG 94
	SER 61	GLY 97
	GLN 63	ARG 94
	ASN 64	GLY 26
	ASP 151	TYR 100B
	LYS 156	ILE 98
	LYS 156	GLU 100G
	TYR 158	ASP 100
	GLU 183	TYR 100E
	LYS 30		ASP 1
	LYS 30		ASP 1
	ASP 31		THR 94
	ASP 31		THR 94
	LYS 146		ASP 28
	ASN 155		THR 31
	ASN 155		SER 50
	VAL 157		THR 31
	Protein	Eculizumab			Protein	Eculizumab
	RNA polymerase	H-Chain	L-Chain		RNA polymerase	H-Chain	L-Chain
	GLU 26	SER 57			SER 46	ALA 9
	GLN 91	ASN 31			SER 46	GLY 8
	ARG 92	GLU 59			GLU 50	SER 7
	SER 102	SER 104			HIS 58	GLN 3
	ASP 103	ASN 106			SER 135	THR 119
	ASP 103	TYR 108			ASN 137	THR 91
	THR 105	SER 103			LYS 141	GLN 39
	THR 105	SER 103			ASP 142		THR 85
	THR 105	SER 104
	MET 106	SER 104
	LYS 36		ASN 28
	ARG 92		THR 94
	ARG 94		ASN 93
	ASP 103		TYR 49
	Protein	Eculizumab mutant (L: L92F)			Protein	Eculizumab mutant (L: L92F)
	RNA polymerase	H-Chain	L-Chain		RNA polymerase	H-Chain	L-Chain
	GLU 26	SER 57			SER 46	ALA 9
	SER 27	GLU 59			SER 46	GLY 8
	GLN 91	ASN 31			GLU 50	SER 7
	ARG 92	GLU 50			HIS 58	GLN 3
	ARG 92	GLU 50			SER 135	THR 119
	ARG 92	GLU 59			LYS 141	GLN 39
	SER 102	SER 104			ASP 142		THR 85
	ASP 103	TYR 108
	THR 105	SER 103
	THR 105	SER 103
	THR 105	SER 104
	MET 106	SER 104
	MET 106	GLY 102
	LYS 36		ASN 28
	ARG 94		PHE 92
	ARG 94		ASN 93
	ASP 103		TYR 49
	Protein	Vofatamab			Protein	Vofatamab
	RNA polymerase	H-Chain	L-Chain		RNA polymerase	H-Chain	L-Chain
	GLN 91	TYR 52			GLU 17	SER 31
	GLN 91	GLY 97			GLU 29	SER 56
	ARG 92	SER 56			GLU 29	TYR 99
	ARG 92	SER 54			SER 37	THR 57
	PRO 96	TYR 100B			LYS 67	SER 74
	THR 105	LEU 100A			ASN 130	THR 73
	MET 106	THR 100F			ASN 130	THR 73
	MET 110	ASP 100			GLY 131	ALA 71
	Protein	Vofatamab mutant (L: H94T, L: Q96V)			Protein	Vofatamab mutant (L: H94T, L: Q96V)
	RNA polymerase	H-Chain	L-Chain		RNA polymerase	H-Chain	L-Chain
	GLU 26	SER 54			GLU 29	SER 56
	GLN 91	GLY 97			GLU 29	TYR 99
	ARG 92	TYR 100E			SER 37	THR 57
	PRO 96	TYR 100B			LYS 67	SER 74
	MET 110	ASP 100			ASN 130	THR 73
					ASN 130	THR 73
					GLY 131	ALA 71

## Sheet: Supplementary Table 3
Triple mutant library from both mAbs (Eculizumab and Vofatamab), through permutation combinations.
S. No.	Triple mutant library
	Double mutant library
	Single mutant library
Mutant library of Eculizumab
1	ARG	98	LEU
2	PHE	101	LEU
3	TRP	107	LEU
4	ASP	110	LYS
5	LEU	92	PHE
6	ARG	98	LEU	PHE	101	LEU
7	PHE	101	LEU	TRP	107	LEU
8	TRP	107	LEU	ASP	110	LYS
9	ASP	110	LYS	LEU	92	PHE
10	LEU	92	PHE	ARG	98	LEU
11	ARG	98	LEU	TRP	107	LEU
12	ARG	98	LEU	ASP	110	LYS
13	TRP	107	LEU	LEU	92	PHE
14	PHE	101	LEU	ASP	110	LYS
15	PHE	101	LEU	LEU	92	PHE
16	ARG	98	LEU	PHE	101	LEU	TRP	107	LEU
17	ARG	98	LEU	PHE	101	LEU	ASP	110	LYS
18	ARG	98	LEU	PHE	101	LEU	LEU	92	PHE
19	ARG	98	LEU	TRP	107	LEU	ASP	110	LYS
20	ARG	98	LEU	TRP	107	LEU	LEU	92	PHE
21	ARG	98	LEU	ASP	110	LYS	LEU	92	PHE
22	PHE	101	LEU	TRP	107	LEU	ASP	110	LYS
23	PHE	101	LEU	TRP	107	LEU	LEU	92	PHE
24	PHE	101	LEU	ASP	110	LYS	LEU	92	PHE
25	TRP	107	LEU	ASP	110	LYS	LEU	92	PHE
Mutant library of Vofatamab
1	TYR	96	ARG
2	TYR	99	PHE
3	GLN	90	ALA
4	HIS	94	THR
5	GLN	96	VAL
6	TYR	96	ARG	TYR	99	PHE
7	TYR	96	ARG	GLN	90	ALA
8	TYR	96	ARG	HIS	94	THR
9	TYR	96	ARG	GLN	96	VAL
10	TYR	99	PHE	GLN	90	ALA
11	TYR	99	PHE	HIS	94	THR
12	GLN	90	ALA	GLN	96	VAL
13	GLN	90	ALA	HIS	94	THR
14	HIS	94	THR	GLN	96	VAL
15	TYR	99	PHE	GLN	96	VAL
16	TYR	96	ARG	TYR	99	PHE	GLN	90	ALA
17	TYR	96	ARG	TYR	99	PHE	HIS	94	THR
18	TYR	96	ARG	TYR	99	PHE	GLN	96	VAL
19	TYR	96	ARG	GLN	90	ALA	HIS	94	THR
20	TYR	96	ARG	GLN	90	ALA	GLN	96	VAL
21	TYR	96	ARG	HIS	94	THR	GLN	96	VAL
22	TYR	99	PHE	GLN	90	ALA	HIS	94	THR
23	TYR	99	PHE	GLN	90	ALA	GLN	96	VAL
24	TYR	99	PHE	HIS	94	THR	GLN	96	VAL
25	GLN	90	ALA	HIS	94	THR	GLN	96	VAL
